# Supplementary material for: Left ventricular thrombus formation after acute myocardial infarction
Source: HighWire-hosted journal article supplement (doi:10.1136/heartjnl-2012-301962), 2012-11-14
Supplement: heartjnl-2012-301962webref.pdf [file heartjnl-2012-301962webref.pdf]

| 2014 | **Jan** | **Feb** | **Mar** | **Apr** | **May** | **Jun** | **Total** | **Monthly average** |
| --- | --- | --- | --- | --- | --- | --- | --- | --- |
| **Admin** | 7 | 6 | 6 | 2 | 4 | 8 | 33 | 5.5 |
| **Nursing** | 27 | 35 | 35 | 19 | 27 | 20 | 163 | 27 |
| **AHP** | 4 | 1 | 4 | 2 | 2 | 2 | 15 | 2.5 |
| **Medical** | 3 | 5 | 1 | 3 | 3 | 2 | 17 | 3 |
| **Totals:** | 41 | 45 | 41 | 26 | 36 | 32 | 228 |  |

Table 1: Datix reporting rates at WGH 2014

Fig 1 Doctor’s job to report?

Fig 2 Hazards noticed but not reported

Fig 3 Fear of getting into trouble

Fig 4 Speed of filling in datix

Fig 4 Ease of filling in datix

Fig 5 Affect of anonymity on reporting

Fig 6 Importance of follow up

Fig 7 Concern re managers

Fig 8. Reporting project adverising poster
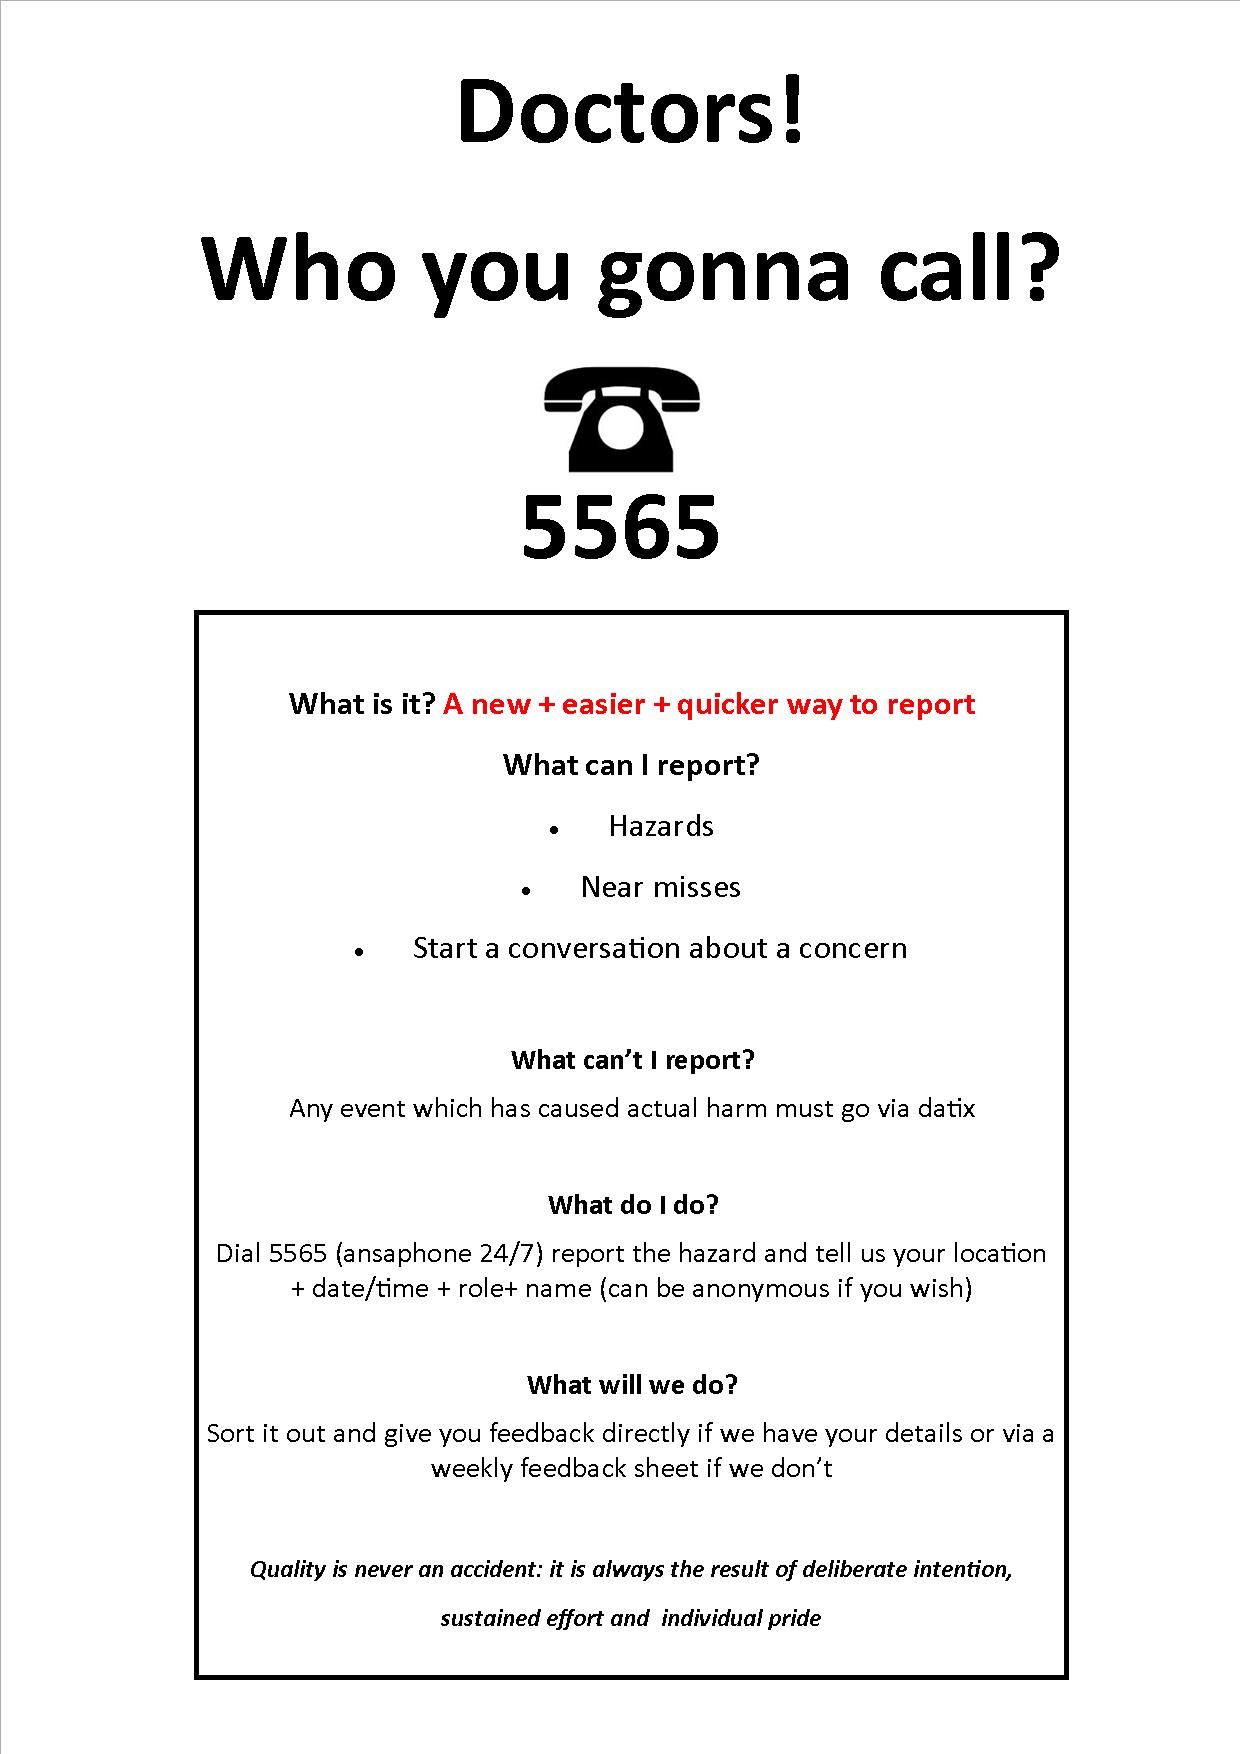


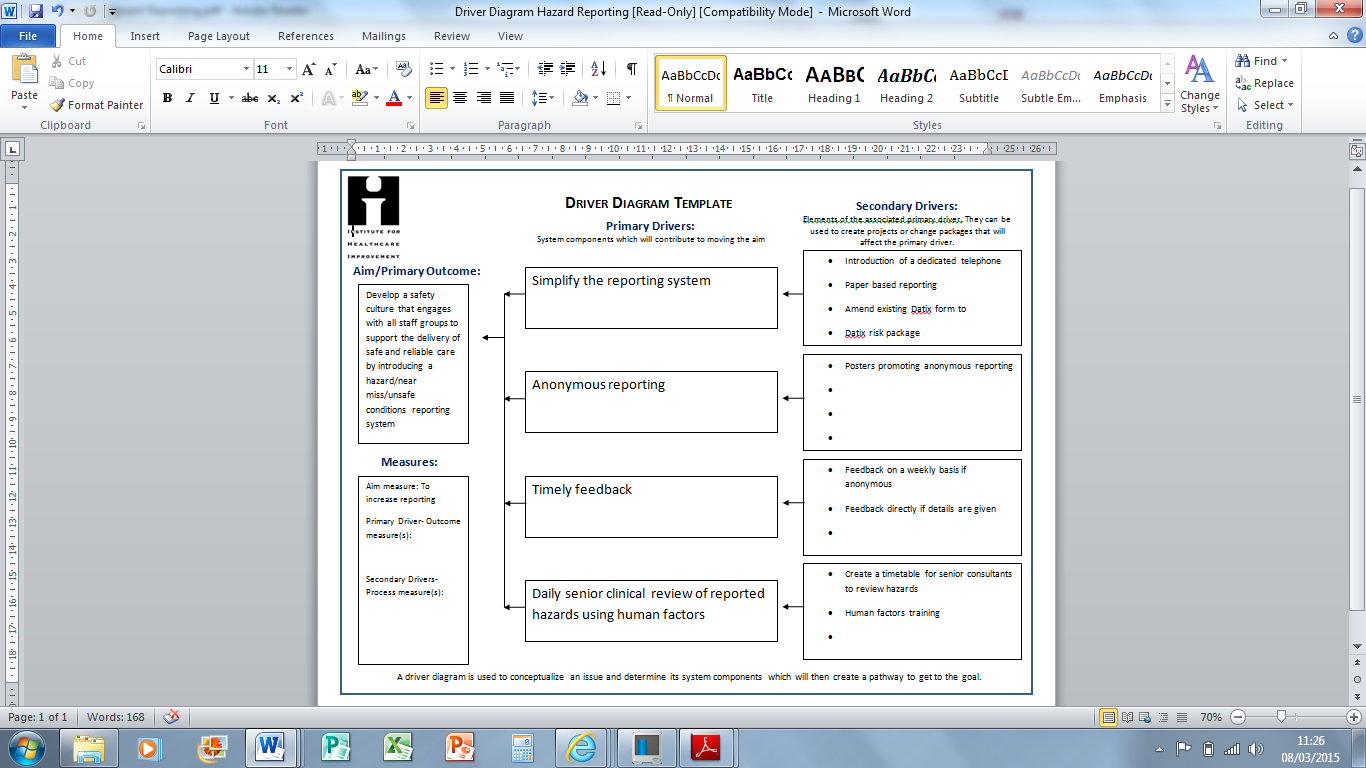


Fig 9 Driver diagram
